# Supplementary material for: Engineering and Characterization of a Long-Half-Life Relaxin Receptor RXFP1 Agonist
Source: PubMed Central journal article supplement (PMC11372834; doi:10.1021/acs.molpharmaceut.4c00368), 2024-08-12
Supplement: mp4c00368_si_001.pdf [file mp4c00368_si_001.pdf]

1 **Supporting Information**

2  
3  
4  
5 **Engineering and characterization of a long half-life relaxin receptor RXFP1 agonist**

6  
7 **Authors:** Sarah C. Erlandson<sup>1</sup>, Jialu Wang<sup>2</sup>, Haoran Jiang<sup>2</sup>, James Osei-Owusu<sup>1</sup>, Howard A.  
8 Rockman<sup>2,3</sup>, Andrew C. Kruse<sup>1\*</sup>

9  
10 **Affiliations:**

11 <sup>1</sup>Department of Biological Chemistry and Molecular Pharmacology, Blavatnik Institute, Harvard  
12 Medical School, Boston, Massachusetts 02115, USA.

13 <sup>2</sup>Department of Medicine, Duke University Medical Center, Durham, North Carolina 27710,  
14 USA.

15 <sup>3</sup>Department of Cell Biology, Duke University Medical Center, Durham, North Carolina 27710,  
16 USA.

17 \*Correspondence and requests for materials should be addressed to  
18 andrew\_kruse@hms.harvard.edu

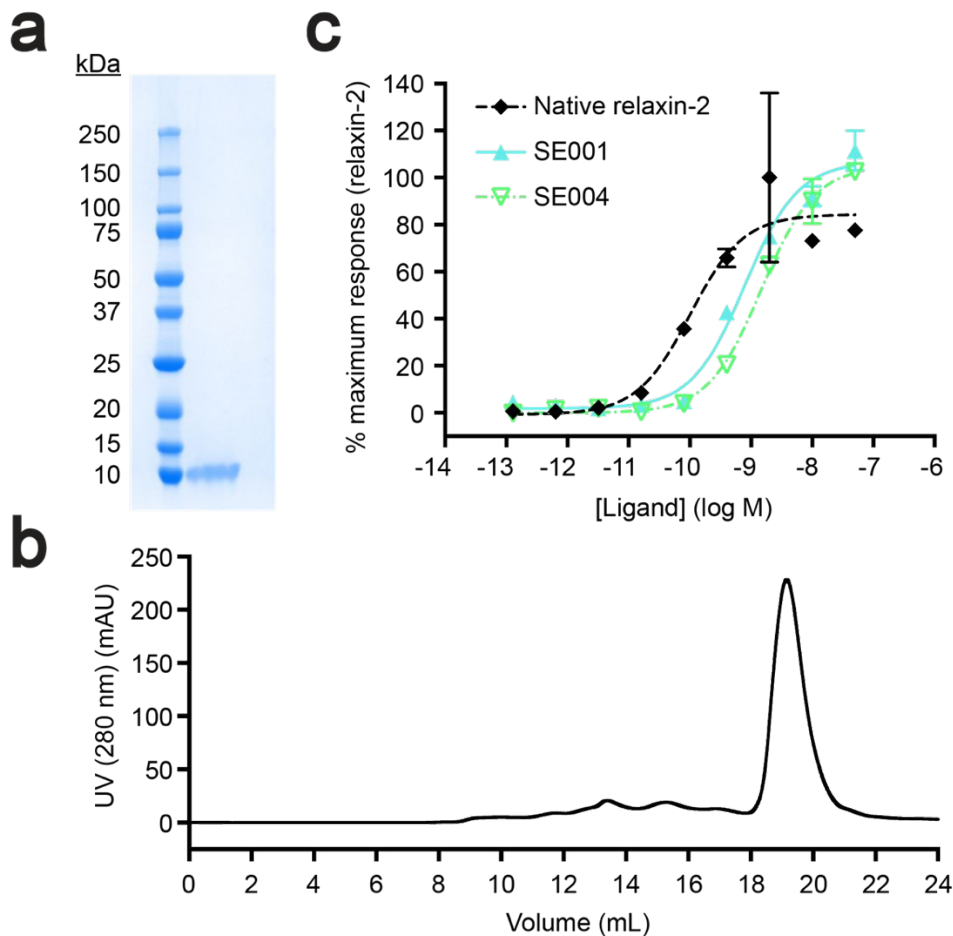

20  
 21 **Figure S1: Purification and characterization of single-chain relaxin-2.** **a**, Coomassie-stained  
 22 SDS-PAGE gel for His-tagged single-chain relaxin-2 (SE001). **b**, Size exclusion  
 23 chromatography profile for His-tagged single-chain relaxin-2 (SE001). **c**, CRE-SEAP  $G_s$   
 24 signaling assay with human RXFP1 for His-tagged single-chain relaxin-2 (SE001) and His-  
 25 tagged, protein C-tagged single-chain relaxin-2 (SE004). Data are normalized to the native  
 26 relaxin-2 response and are mean  $\pm$  s.e.m. from technical triplicates.  
 27

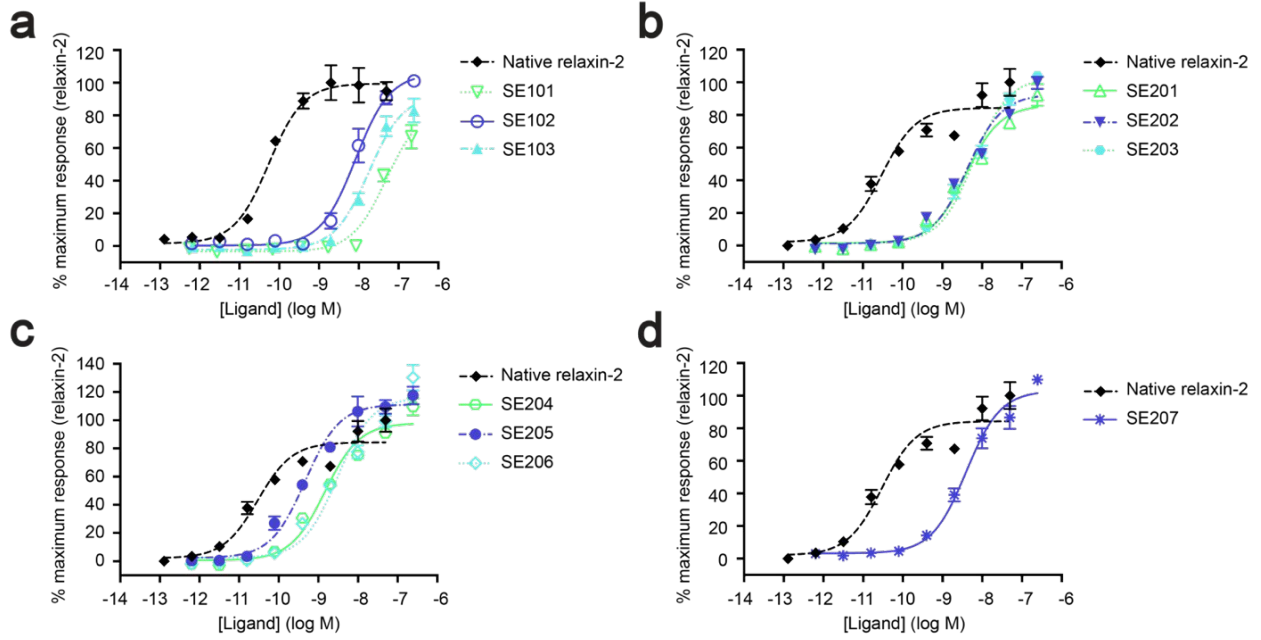

28

29 **Figure S2: Optimizations of Fc-relaxin-2 fusions.** a-d, CRE-SEAP  $G_s$  signaling data for  
 30 human RXFP1 using native relaxin-2 compared to SE101–SE103 (a), SE201–SE203 (b),  
 31 SE204–SE206 (c), and SE207 (d). Data are normalized to the native relaxin-2 response at human  
 32 RXFP1 and are mean  $\pm$  s.e.m. from technical triplicates.

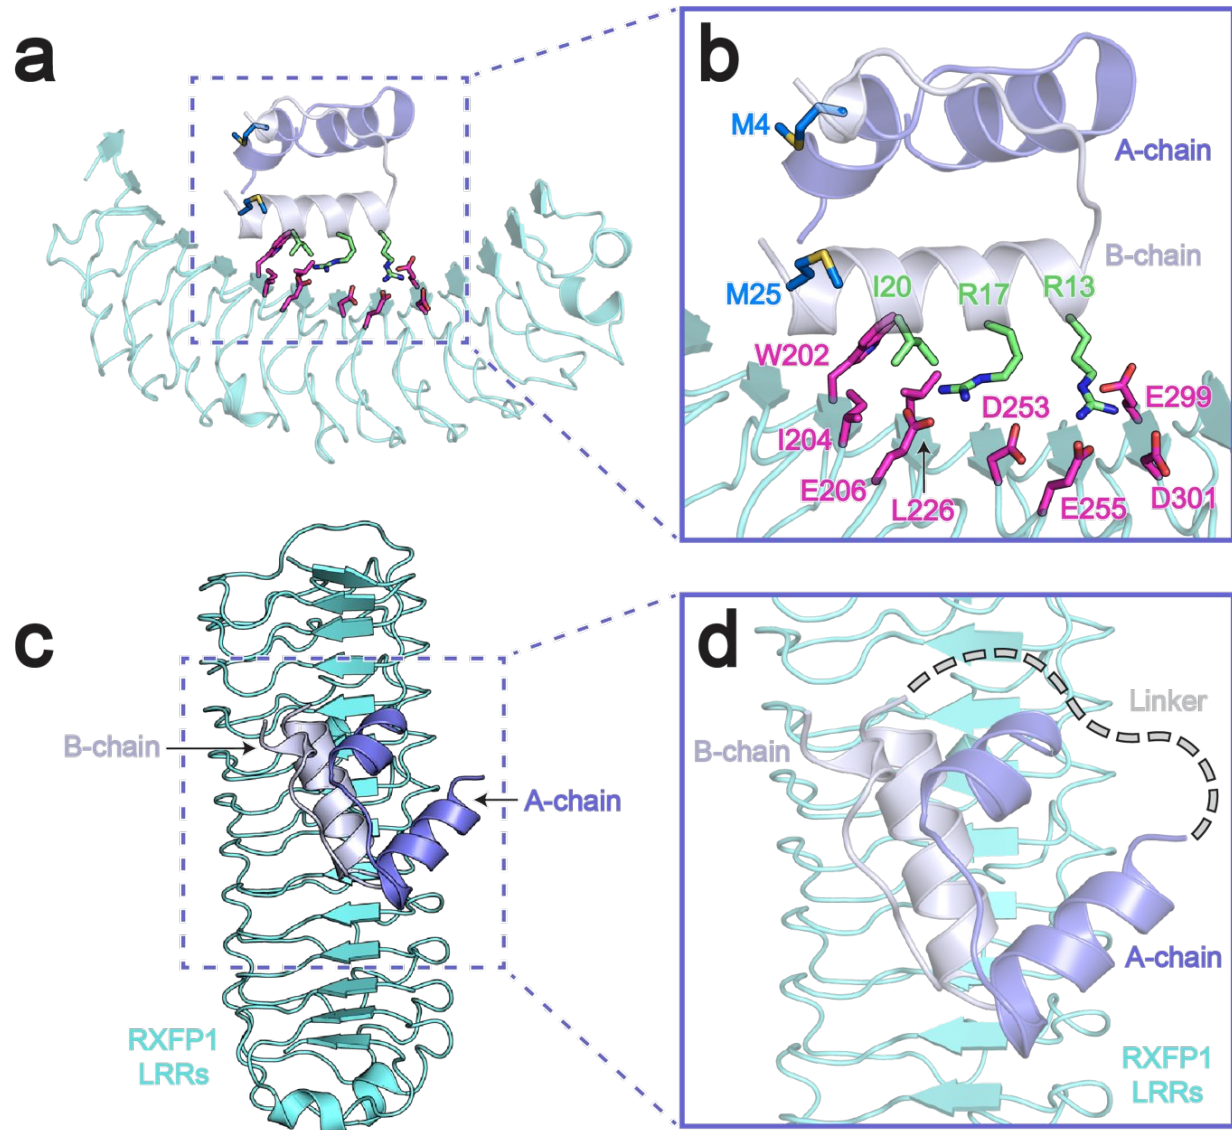

33

34 **Figure S3: Sites of relaxin-2 engineering in Fc-relaxin-2 fusion constructs.** **a,c**, Docking  
 35 model of relaxin-2 bound to the leucine-rich repeats (LRRs) of RXFP1's ectodomain <sup>1</sup>. **b**, Details  
 36 of the relaxin-2–LRR interface. In magenta are RXFP1 residues involved in the binding  
 37 interface, in green are the “relaxin-binding cassette” residues of relaxin-2's B-chain, Arg13,  
 38 Arg17, and Ile20, and in blue are the Met residues mutated to Lys in SE301. The Trp28 residue  
 39 was not included in the docking model. The model shows that the Met residues on the relaxin-2  
 40 B-chain are not positioned near the binding interface. **d**, Based on the model, the position of the  
 41 single-chain relaxin-2 “mini-C” linker likely does not interfere with the binding of relaxin-2 to  
 42 RXFP1.

43

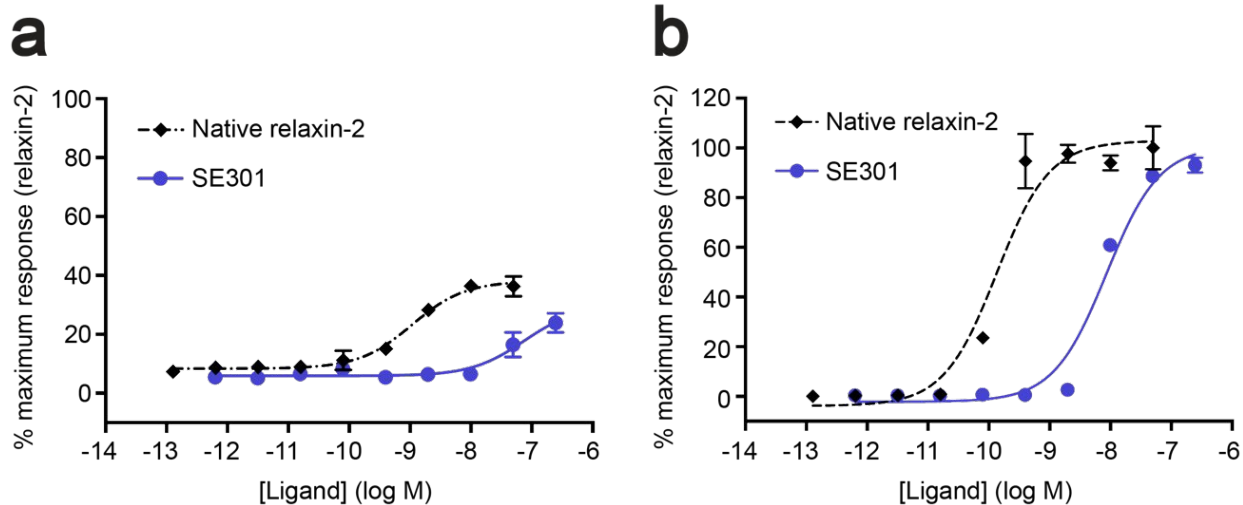

44  
 45 **Figure S4: SE301 signaling activity at human RXFP2 and mouse RXFP1. a,** CRE-SEAP  $G_s$   
 46 signaling assay data for SE301 compared to native relaxin-2 at human RXFP2. Data are  
 47 normalized to the native relaxin-2 response at human RXFP1 and are mean  $\pm$  s.e.m. from  
 48 technical triplicates. **b,** CRE-SEAP  $G_s$  signaling assay data for SE301 compared to native human  
 49 relaxin-2 at mouse RXFP1. Data are normalized to the native human relaxin-2 response at mouse  
 50 RXFP1 and are mean  $\pm$  s.e.m. from technical triplicates.

51  
 52

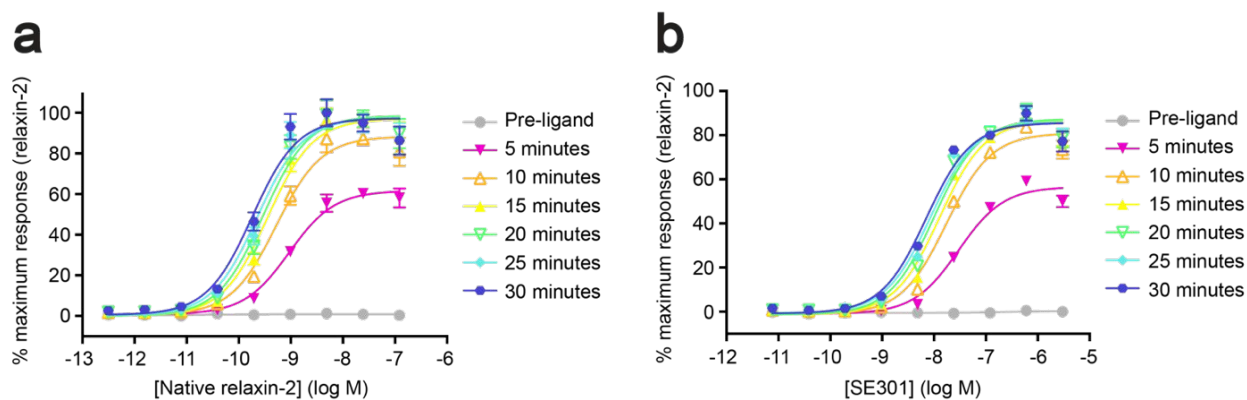

53  
 54 **Figure S5: SE301 versus native relaxin-2 activity in the  $G_s$  GloSensor cAMP assay. a-b,**  
 55 GloSensor  $G_s$  signaling assay data for native relaxin-2 (a) and SE301 (b) with measurements  
 56 taken before ligand addition, and 5, 10, 15, 20, 25, and 30 minutes after ligand addition. Data are  
 57 normalized to the native relaxin-2 response at human RXFP1 and are mean  $\pm$  s.e.m. from  
 58 technical triplicates.

59  
 60

61 **Table S1: CRE-SEAP G<sub>s</sub> signaling assay EC<sub>50</sub> and E<sub>max</sub> data for Figure 1c**

62 †Mean ± s.e.m., n=3 technical replicates.

| Ligand           | pEC <sub>50</sub> | E <sub>max</sub> (%) |
|------------------|-------------------|----------------------|
| Native relaxin-2 | 10.0 ± 0.06       | 100 ± 2.0            |
| SE301            | 8.2 ± 0.05        | 110 ± 2.5            |
| Fc N297Q         | ND                | ND                   |

63

64 **Table S2: CRE-SEAP G<sub>s</sub> signaling assay EC<sub>50</sub> and E<sub>max</sub> data for Figure S1c**

65 †Mean ± s.e.m., n=3 technical replicates.

| Ligand           | pEC <sub>50</sub> | E <sub>max</sub> (%) |
|------------------|-------------------|----------------------|
| Native relaxin-2 | 10.0 ± 0.2        | 100 ± 6.9            |
| SE001            | 9.1 ± 0.1         | 126 ± 3.3            |
| SE004            | 8.8 ± 0.1         | 124 ± 2.9            |

71

72 **Table S3: CRE-SEAP G<sub>s</sub> signaling assay EC<sub>50</sub> and E<sub>max</sub> data for Figure S2**

73 †Mean ± s.e.m., n=3 technical replicates.

| Ligand           | pEC <sub>50</sub> | E <sub>max</sub> (%) |
|------------------|-------------------|----------------------|
| Native relaxin-2 | 10.3 ± 0.1        | 100 ± 3.1            |
| SE101            | 7.3 ± 0.1         | 86 ± 7.4             |
| SE102            | 8.1 ± 0.1         | 106 ± 3.9            |
| SE103            | 7.7 ± 0.1         | 93 ± 4.5             |
| Native relaxin-2 | 10.5 ± 0.1        | 100 ± 3.5            |
| SE201            | 8.4 ± 0.1         | 102 ± 3.1            |
| SE202            | 8.4 ± 0.1         | 110 ± 3.3            |
| SE203            | 8.2 ± 0.1         | 122 ± 3.0            |
| SE204            | 8.8 ± 0.1         | 116 ± 3.3            |
| SE205            | 9.3 ± 0.1         | 132 ± 3.1            |
| SE206            | 8.5 ± 0.1         | 138 ± 4.9            |
| SE207            | 8.4 ± 0.1         | 122 ± 3.3            |

74

75

76

77

78 **Table S4: CRE-SEAP G<sub>s</sub> signaling assay EC<sub>50</sub> and E<sub>max</sub> data for Figure S4**

79 †Mean ± s.e.m., n=3 technical replicates.

| <b>Ligand</b>                 | <b>pEC<sub>50</sub></b> | <b>E<sub>max</sub> (%)</b> |
|-------------------------------|-------------------------|----------------------------|
| Native relaxin-2, human RXFP2 | 9.0 ± 0.1               | 38 ± 1.7                   |
| SE301, human RXFP2            | 7.1 ± 0.3               | 30 ± 5.7                   |
| Native relaxin-2, mouse RXFP1 | 9.9 ± 0.1               | 100 ± 4.2                  |
| SE301, mouse RXFP1            | 8.1 ± 0.1               | 98 ± 3.7                   |

80

81 **Table S5: GloSensor G<sub>s</sub> signaling assay EC<sub>50</sub> and E<sub>max</sub> data for Figure S5**

82 †Mean ± s.e.m., n=3 technical replicates.

| <b>Ligand</b>                | <b>pEC<sub>50</sub></b> | <b>E<sub>max</sub> (%)</b> |
|------------------------------|-------------------------|----------------------------|
| Native relaxin-2, Pre-ligand | ND                      | 1 ± 0.2                    |
| Native relaxin-2, 5 minutes  | 9.0 ± 0.1               | 63 ± 1.7                   |
| Native relaxin-2, 10 minutes | 9.3 ± 0.1               | 91 ± 2.7                   |
| Native relaxin-2, 15 minutes | 9.4 ± 0.1               | 100 ± 2.9                  |
| Native relaxin-2, 20 minutes | 9.5 ± 0.1               | 101 ± 2.9                  |
| Native relaxin-2, 25 minutes | 9.6 ± 0.1               | 100 ± 3.2                  |
| Native relaxin-2, 30 minutes | 9.7 ± 0.1               | 100 ± 3.1                  |
| SE301, Pre-ligand            | ND                      | 0 ± 0.5                    |
| SE301, 5 minutes             | 7.5 ± 0.1               | 58 ± 1.6                   |
| SE301, 10 minutes            | 7.8 ± 0.1               | 83 ± 2.0                   |
| SE301, 15 minutes            | 7.9 ± 0.1               | 89 ± 2.0                   |
| SE301, 20 minutes            | 8.0 ± 0.1               | 90 ± 2.2                   |
| SE301, 25 minutes            | 8.1 ± 0.1               | 89 ± 2.2                   |
| SE301, 30 minutes            | 8.1 ± 0.1               | 88 ± 2.0                   |

83

84

85

86

87

88

89

90 **Table S6: CRE-SEAP G<sub>s</sub> signaling assay EC<sub>50</sub> and E<sub>max</sub> data for Figure 3b**

91 †Mean ± s.e.m., n=3 technical replicates.

| <b>Ligand</b>    | <b>pEC<sub>50</sub></b> | <b>E<sub>max</sub> (%)</b> |
|------------------|-------------------------|----------------------------|
| Native relaxin-2 | 9.9 ± 0.05              | 100 ± 1.7                  |
| SE301 Day 0      | 8.1 ± 0.05              | 102 ± 2.4                  |
| SE301 Day 7      | 8.2 ± 0.03              | 104 ± 1.3                  |
| SE301 Day 14     | 8.1 ± 0.1               | 98 ± 2.4                   |
| SE301 Day 21     | 8.1 ± 0.04              | 98 ± 2.0                   |
| SE301 Day 28     | 8.3 ± 0.04              | 108 ± 2.1                  |

92

93

94

#### Supplementary references

95

- 96 1. Erlandson, S. C. *et al.* The relaxin receptor RXFP1 signals through a mechanism of  
97 autoinhibition. *Nat Chem Biol* **19**, 1013–1021 (2023).

98



**Table S7: Construct sequences.**

| Name  | Sequence                                                                                                                                                                                                                                                                                                                          |
|-------|-----------------------------------------------------------------------------------------------------------------------------------------------------------------------------------------------------------------------------------------------------------------------------------------------------------------------------------|
| SE001 | MKTIIALSYIFCLVFAHHHHHHDSWMEEVIKLCGRELVRAQIAICGMSTWSDAASSHSHSSARQLYSALANKCCHVGCTKRSLARFC                                                                                                                                                                                                                                           |
| SE004 | MKTIIALSYIFCLVFAEDQVDPRLIDGKGSHHHHHHDSWMEEVIKLCGRELVRAQIAICGMSTWSDAASSHSHSSARQLYSALANKCCHVGCTKRSLARFC                                                                                                                                                                                                                             |
| SE101 | MYRMQLLSICIALSLALVTNSDSWMEEVIKLCGRELVRAQIAICGMSTWSDAASSHSHSSARQLYSALANKCCHVGCTKRSLARFCGSGGSGDKTHTCPPCPAPELLGGPSVFLFPPKPKDTLMISRTPEVTCVVVDVSHEDPEVKFNWYVDGVEVHNAKTKPREEQYNSTYRVVSVLTVLHQDWLNGKEYKCKVSNKALPAPIEKTISKAKGQPREPQVYTLPPSREEMTKNQVSLTCLVKGFYPSDIAVEWESNGQPENNYKTTPPVLDSDGSFFLYSKLTVDKSRWQQGNVFCFSVMHEALHNHYTQKSLSLSPGK   |
| SE102 | MKTIIALSYIFCLVFAADKTHTCPPCPAPELLGGPSVFLFPPKPKDTLMISRTPEVTCVVVDVSHEDPEVKFNWYVDGVEVHNAKTKPREEQYNSTYRVVSVLTVLHQDWLNGKEYKCKVSNKALPAPIEKTISKAKGQPREPQVYTLPPSREEMTKNQVSLTCLVKGFYPSDIAVEWESNGQPENNYKTTPPVLDSDGSFFLYSKLTVDKSRWQQGNVFCFSVMHEALHNHYTQKSLSLSPGKGGSDSWMEEVIKLCGRELVRAQIAICGMSTWSDAASSHSHSSARQLYSALANKCCHVGCTKRSLARFC          |
| SE103 | MKTIIALSYIFCLVFAADKTHTCPPCPAPELLGGPSVFLFPPKPKDTLMISRTPEVTCVVVDVSHEDPEVKFNWYVDGVEVHNAKTKPREEQYNSTYRVVSVLTVLHQDWLNGKEYKCKVSNKALPAPIEKTISKAKGQPREPQVYTLPPSREEMTKNQVSLTCLVKGFYPSDIAVEWESNGQPENNYKTTPPVLDSDGSFFLYSKLTVDKSRWQQGNVFCFSVMHEALHNHYTQKSLSLSPGKGGSGGSGGSGGSDSWMEEVIKLCGRELVRAQIAICGMSTWSDAASSHSHSSARQLYSALANKCCHVGCTKRSLARFC |
| SE201 | MKTIIALSYIFCLVFAADKTHTCPPCPAPELLGGPSVFLFPPKPKDTLMISRTPEVTCVVVDVSHEDPEVKFNWYVDGVEVHNAKTKPREEQYQSTYRVVSVLTVLHQDWLNGKEYKCKVSNKALPAPIEKTISKAKGQPREPQVYTLPPSREEMTKNQVSLTCLVKGFYPSDIAVEWESNGQPENNYKTTPPVLDSDGSFFLYSKLTVDKSRWQQGNVFCFSVMHEALHNHYTQKSLSLSPGKGGSDSWMEEVIKLCGRELVRAQIAICGMSTWSDAASSHSHSSARQLYSALANKCCHVGCTKRSLARFC          |
| SE202 | MKTIIALSYIFCLVFAADKTHTCPPCPAPELLGGPSVFLFPPKPKDTLMISRTPEVTCVVVDVSHEDPEVKFNWYVDGVEVHNAKTKPREEQYQSTYRVVSVLTVLHQDWLNGKEYKCKVSNKALPAPIEKTISKAKGQPREPQVYTLPPSREEMTKNQVSLTCLVKGFYPSDIAVEWESNGQPENNYKTTPPVLDSDGSFFLYSKLTVDKSRWQQGNVFCFSVMHEALHNHYTQKSLSLSPGKAAADSWMEEVIKLCGRELVRAQIAICGMSTWSDAASSHSHSSARQLYSALANKCCHVGCTKRSLARFC          |
| SE203 | MKTIIALSYIFCLVFAADKTHTCPPCPAPELLGGPSVFLFPPKPKDTLMISRTPEVTCVVVDVSHEDPEVKFNWYVDGVEVHNAKTKPREEQYQSTYRVVSVLTVLHQDWLNGKEYKCKVSNKALPAPIEKTISKAKGQPREP                                                                                                                                                                                   |

|                 |                                                                                                                                                                                                                                                                                                                                                                                                        |
|-----------------|--------------------------------------------------------------------------------------------------------------------------------------------------------------------------------------------------------------------------------------------------------------------------------------------------------------------------------------------------------------------------------------------------------|
|                 | QVYTLPPSREEMTKNQVSLTCLVKGFYPSDIAVEWESNGQPENNYKTTPPVLDSDGSFFLYSKLTVDKSRW<br>QQGNVFSCSVMHEALHNHYTQKSLSLSPGKPPPDSWMEEVIKLCGRELVRAQIAICGMSTWSDAASSHS<br>SSARQLYSALANKCCHVGCTKRSLARFC                                                                                                                                                                                                                       |
| <b>SE204</b>    | MKTIALS <sup>YIFCLVFA</sup> DKTHTCPPCPAPELLGGPSVFLFPPKPKDTLMISRTPEVTCVVVDVSHEDPEVKFNW<br>YVDGVEVHNAKTKPREEQY <sup>Q</sup> STYRVVSVLTVLHQDWLNGKEYKCKVSNKALPAPIEKTISKAKGQPREP<br>QVYTLPPSREEMTKNQVSLTCLVKGFYPSDIAVEWESNGQPENNYKTTPPVLDSDGSFFLYSKLTVDKSRW<br>QQGNVFSCSVMHEALHNHYTQKSLSLSPGKGGSDSW <sup>K</sup> EEVIKLCGRELVRAQIAICGMSTWSDAASSHS<br>SSARQLYSALANKCCHVGCTKRSLARFC                           |
| <b>SE205</b>    | MKTIALS <sup>YIFCLVFA</sup> DKTHTCPPCPAPELLGGPSVFLFPPKPKDTLMISRTPEVTCVVVDVSHEDPEVKFNW<br>YVDGVEVHNAKTKPREEQY <sup>Q</sup> STYRVVSVLTVLHQDWLNGKEYKCKVSNKALPAPIEKTISKAKGQPREP<br>QVYTLPPSREEMTKNQVSLTCLVKGFYPSDIAVEWESNGQPENNYKTTPPVLDSDGSFFLYSKLTVDKSRW<br>QQGNVFSCSVMHEALHNHYTQKSLSLSPGKGGSDSWMEEVIKLCGRELVRAQIAICG <sup>K</sup> STWSDAASSHS<br>SSARQLYSALANKCCHVGCTKRSLARFC                           |
| <b>SE206</b>    | MKTIALS <sup>YIFCLVFA</sup> DKTHTCPPCPAPELLGGPSVFLFPPKPKDTLMISRTPEVTCVVVDVSHEDPEVKFNW<br>YVDGVEVHNAKTKPREEQY <sup>Q</sup> STYRVVSVLTVLHQDWLNGKEYKCKVSNKALPAPIEKTISKAKGQPREP<br>QVYTLPPSREEMTKNQVSLTCLVKGFYPSDIAVEWESNGQPENNYKTTPPVLDSDGSFFLYSKLTVDKSRW<br>QQGNVFSCSVMHEALHNHYTQKSLSLSPGKGGSDSWMEEVIKLCGRELVRAQIAICGM <sup>ST</sup> ASDAASSHS<br>SSARQLYSALANKCCHVGCTKRSLARFC                           |
| <b>SE207</b>    | MKTIALS <sup>YIFCLVFA</sup> DKTHTCPPCPAPELLGGPSVFLFPPKPKDTLMISRTPEVTCVVVDVSHEDPEVKFNW<br>YVDGVEVHNAKTKPREEQY <sup>Q</sup> STYRVVSVLTVLHQDWLNGKEYKCKVSNKALPAPIEKTISKAKGQPREP<br>QVYTLPPSREEMTKNQVSLTCLVKGFYPSDIAVEWESNGQPENNYKTTPPVLDSDGSFFLYSKLTVDKSRW<br>QQGNVFSCSVMHEALHNHYTQKSLSLSPGKGGSDSWMEEVIKLCGRELVRAQIAICGMSTWSDAAG <sup>ANA</sup><br>NAGARQLYSALANKCCHVGCTKRSLARFC                           |
| <b>SE301</b>    | MKTIALS <sup>YIFCLVFA</sup> DKTHTCPPCPAPELLGGPSVFLFPPKPKDTLMISRTPEVTCVVVDVSHEDPEVKFNW<br>YVDGVEVHNAKTKPREEQY <sup>Q</sup> STYRVVSVLTVLHQDWLNGKEYKCKVSNKALPAPIEKTISKAKGQPREP<br>QVYTLPPSREEMTKNQVSLTCLVKGFYPSDIAVEWESNGQPENNYKTTPPVLDSDGSFFLYSKLTVDKSRW<br>QQGNVFSCSVMHEALHNHYTQKSLSLSPGKGGSDSW <sup>K</sup> EEVIKLCGRELVRAQIAICG <sup>K</sup> STASDAAG <sup>ANAN</sup><br>AGARQLYSALANKCCHVGCTKRSLARFC |
| <b>Fc N297Q</b> | MKTIALS <sup>YIFCLVFA</sup> DKTHTCPPCPAPELLGGPSVFLFPPKPKDTLMISRTPEVTCVVVDVSHEDPEVKFNW<br>YVDGVEVHNAKTKPREEQY <sup>Q</sup> STYRVVSVLTVLHQDWLNGKEYKCKVSNKALPAPIEKTISKAKGQPREP<br>QVYTLPPSREEMTKNQVSLTCLVKGFYPSDIAVEWESNGQPENNYKTTPPVLDSDGSFFLYSKLTVDKSRW<br>QQGNVFSCSVMHEALHNHYTQKSLSLSPGK                                                                                                               |

99 Legend: Signal sequence, His tag, Protein C tag, Relaxin-2 A-chain, Relaxin-2 B-chain, Fc, Mutation
